# Supplementary material for: Trends of Colorectal Cancer Screening Rates in Korea: Korean National Cancer Screening Survey 2005–2020
Source: PubMed Central journal article supplement — Gut Liver. 2022 Apr 22;16(6):930–41. doi: 10.5009/gnl210419 (PMC9668502; doi:10.5009/gnl210419), 2022-04-22
Supplement: gnl-16-6-930-supple.pdf [file gnl-16-6-930-supple.pdf]

### A Opportunistic

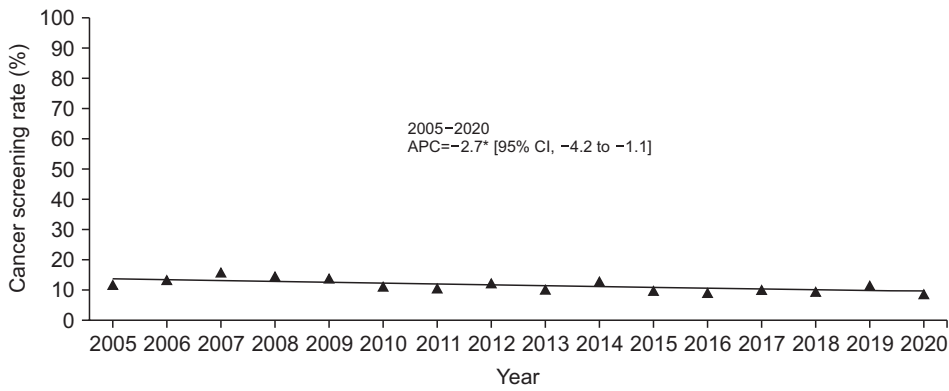

### B Organized

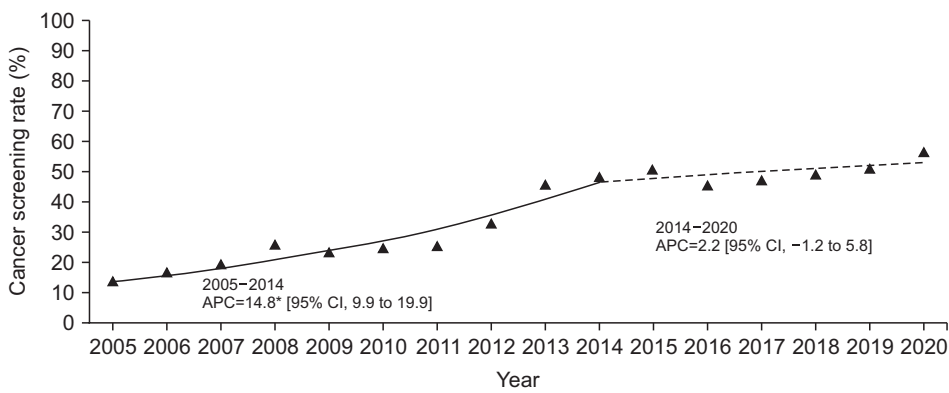

**Supplementary Fig. 1.** Trends of opportunistic and organized cancer screening rates for colorectal cancer, 2005–2020. (A, B) The solid line denotes a significant increasing or decreasing trend, while the dashed line denotes a nonsignificant change. CI, confidence interval. \*p-value for the trend of annual percent change (APC) <0.05.

**Supplementary Table 1.** Distribution of the Study Participants According to Sociodemographic Characteristics in the Korean National Cancer Screening Survey, 2005–2020

| Characteristics             | Distribution of the study participants in the survey year |      |      |      |      |       |       |       |       |       |       |       |       |       |       |       |
|-----------------------------|-----------------------------------------------------------|------|------|------|------|-------|-------|-------|-------|-------|-------|-------|-------|-------|-------|-------|
|                             | 2005                                                      | 2006 | 2007 | 2008 | 2009 | 2010  | 2011  | 2012  | 2013  | 2014  | 2015  | 2016  | 2017  | 2018  | 2019  | 2020  |
| Total No.                   | 968                                                       | 971  | 958  | 955  | 949  | 1,999 | 2,102 | 2,120 | 2,154 | 2,122 | 2,122 | 2,206 | 2,245 | 2,277 | 2,425 | 2,467 |
| Sex, %                      |                                                           |      |      |      |      |       |       |       |       |       |       |       |       |       |       |       |
| Male                        | 46.8                                                      | 46.5 | 45.8 | 47.8 | 48.1 | 48.2  | 48.6  | 48.7  | 48.6  | 49.0  | 49.1  | 49.2  | 49.3  | 49.3  | 48.8  | 48.8  |
| Female                      | 53.2                                                      | 53.5 | 54.2 | 52.2 | 51.9 | 51.8  | 51.4  | 51.3  | 51.4  | 51.0  | 50.9  | 50.8  | 50.7  | 50.7  | 51.2  | 51.2  |
| Age, %                      |                                                           |      |      |      |      |       |       |       |       |       |       |       |       |       |       |       |
| 50–59 yr                    | 61.0                                                      | 45.6 | 45.6 | 52.9 | 53.1 | 54.5  | 56.1  | 56.3  | 56.7  | 55.9  | 55.0  | 54.4  | 53.7  | 52.9  | 47.3  | 45.9  |
| 60–69 yr                    | 33.5                                                      | 40.0 | 46.1 | 35.0 | 34.4 | 33.5  | 31.7  | 31.5  | 31.9  | 31.7  | 32.9  | 34.1  | 34.9  | 35.8  | 33.4  | 34.7  |
| 70–74 yr                    | 5.6                                                       | 14.4 | 8.3  | 12.1 | 12.5 | 12.0  | 12.2  | 12.3  | 11.3  | 12.4  | 12.1  | 11.5  | 11.4  | 11.3  | 19.3  | 19.5  |
| Monthly household income, % |                                                           |      |      |      |      |       |       |       |       |       |       |       |       |       |       |       |
| Lower                       | 38.6                                                      | 42.5 | 35.3 | 31.9 | 40.8 | 28.7  | 27.0  | 26.4  | 39.3  | 27.9  | 30.5  | 41.7  | 32.1  | 31.1  | 32.8  | 32.8  |
| Medium                      | 38.6                                                      | 35.7 | 38.2 | 39.1 | 39.3 | 36.3  | 37.2  | 41.3  | 30.3  | 37.0  | 36.3  | 28.1  | 40.9  | 34.2  | 32.7  | 31.9  |
| Higher                      | 22.7                                                      | 21.8 | 26.5 | 29.0 | 19.8 | 35.1  | 35.8  | 32.2  | 30.5  | 35.1  | 33.2  | 30.3  | 27.0  | 34.8  | 34.6  | 35.2  |
| Education, %                |                                                           |      |      |      |      |       |       |       |       |       |       |       |       |       |       |       |
| Lower                       | 58.5                                                      | 63.9 | 61.9 | 57.0 | 50.5 | 35.6  | 33.9  | 33.3  | 21.9  | 19.8  | 21.9  | 16.7  | 23.8  | 20.5  | 23.6  | 21.0  |
| Medium                      | 34.7                                                      | 28.5 | 29.6 | 35.8 | 38.8 | 50.4  | 51.5  | 52.6  | 54.9  | 56.7  | 57.1  | 56.4  | 57.6  | 58.9  | 58.6  | 60.5  |
| Higher                      | 6.8                                                       | 7.7  | 8.6  | 7.3  | 10.7 | 13.9  | 14.7  | 14.1  | 23.3  | 23.5  | 21.0  | 27.0  | 18.7  | 20.6  | 17.7  | 18.6  |
| Residential area, %         |                                                           |      |      |      |      |       |       |       |       |       |       |       |       |       |       |       |
| Rural                       | 15.6                                                      | 14.4 | 15.4 | 11.9 | 11.7 | 15.0  | 14.9  | 31.2  | 16.0  | 8.5   | 7.3   | 14.4  | 12.7  | 14.0  | 12.6  | 11.2  |
| Urban                       | 84.4                                                      | 85.6 | 84.6 | 88.2 | 88.4 | 85.1  | 85.1  | 68.8  | 84.0  | 91.6  | 92.7  | 85.6  | 87.4  | 86.1  | 87.4  | 88.8  |
